# Supplementary material for: The effect of crystallinity of HDPE precursor film on the properties of the resultant radiation-grafted anion-exchange membranes
Source: Royal Society of Chemistry journal article supplement (doi:10.1039/d5lp00277j), 2025-10-27
Supplement: d5lp00277j1.pdf [file d5lp00277j1.pdf]

Electronic Supplementary Information (ESI)

## The effect of crystallinity of HDPE precursor film on the properties of the resultant radiation-grafted anion-exchange membranes

Siân A. Franklin, Carol Crean and John R. Varcoe

This electronic supplementary information document contains Figures that are in support of those in the main article.

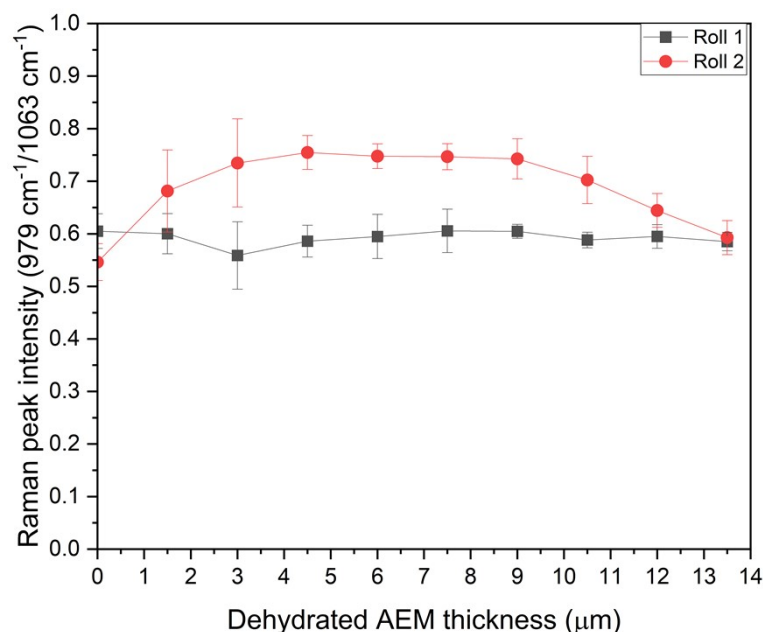

**Figure S1** A plot demonstrating the homogeneity of the amination reaction using a peak intensity ratio, obtained using Raman spectroscopy. The intensity ratio of a  $979\text{ cm}^{-1}$  peak (from quaternary trimethylammonium group) was plotted normalised to the intensity of a  $1063\text{ cm}^{-1}$  C-C anti-symmetric stretching peak (from precursor HDPE) to demonstrate homogeneous amination through the core of the RG-AEM. An InVia Reflex Raman Microscope (Renishaw UK) fitted with a cool charged couple detector, holographic notch filters, a  $1200\text{ mm}^{-1}$  grating and a  $785\text{ nm}$  laser was used to obtain the spectra. A 50XL (NA = 0.50) objective was used along with an exposure time of 1 s and 20 accumulations per spectra. The peak intensity ratio was collected through the core of the dehydrated RG-AEM samples using a  $1.5\text{ }\mu\text{m}$  step size. This measurement was repeated with a random sample from roll 1 and 2 with  $n = 3$  repeats from each sample.

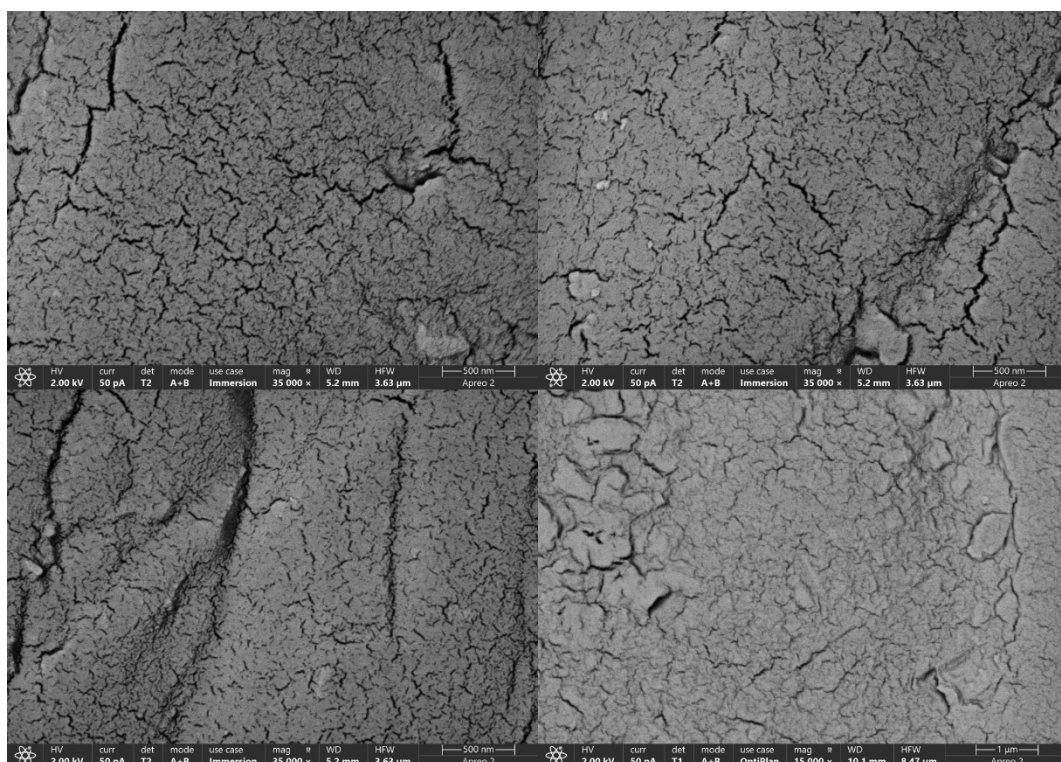

**Figure S2** SEM of RG-AEMs synthesised from roll 1, collected using an Apreo SEM. RG-AEMs were prepared by heating at 50 °C for 3 h. The samples were then mounted on to a stub using double sided carbon tape and applying a 3 nm layer of gold to the surface using a Quorum Q150 ES plus.

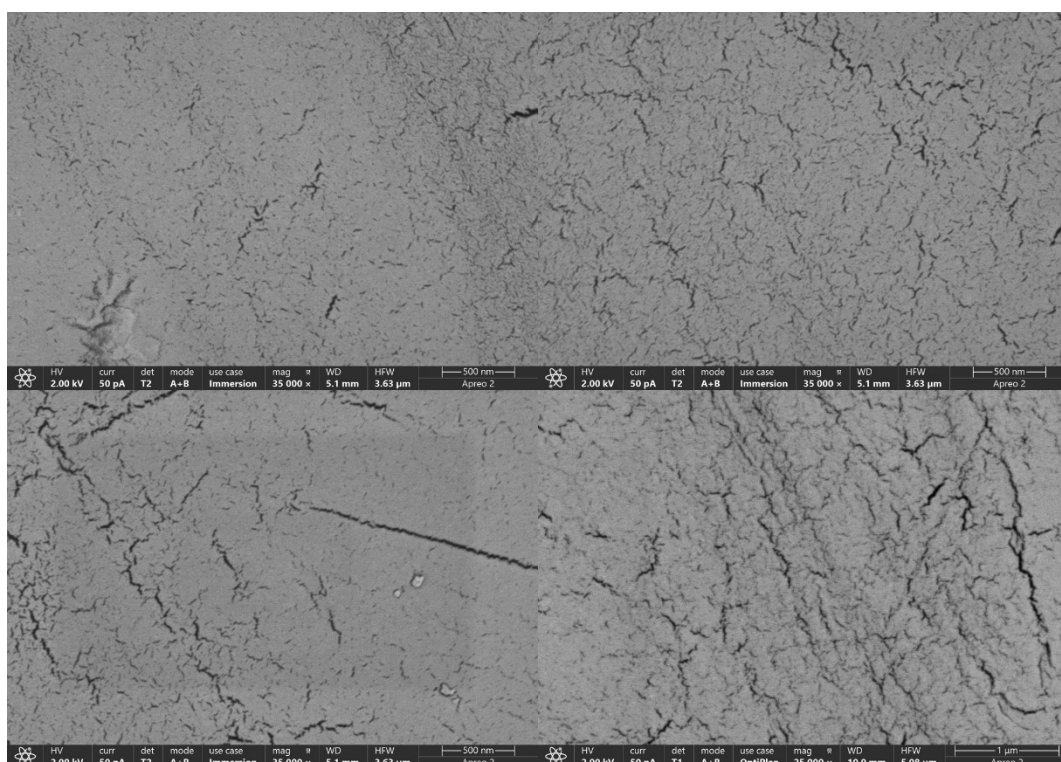

**Figure S3** SEM of RG-AEMs synthesised from roll 2, collected using an Apreo SEM. RG-AEMs were prepared by heating at 50 °C for 3 h. The samples were then mounted on to a stub using double sided carbon tape and applying a 3 nm layer of gold to the surface using a Quorum Q150 ES plus.

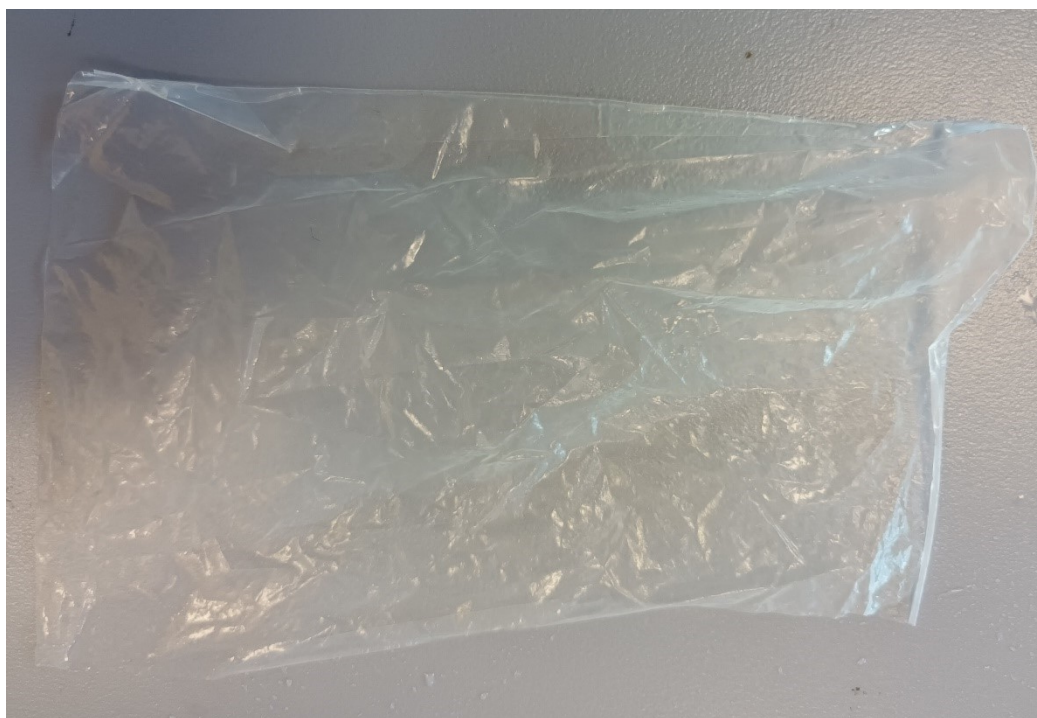

**Figure S4** Photo of a typical RG-AEM. No obvious structural defects are observed on the macroscale.
